# Supplementary material for: Circulating microRNAs 34a, 122, and 192 are linked to obesity-associated inflammation and metabolic disease in pediatric patients
Source: PubMed Central journal article supplement (PMC8310785; doi:10.1038/s41366-021-00842-1), 2021-05-13
Supplement: 41366_2021_842_MOESM3_ESM.pdf [file 41366_2021_842_MOESM3_ESM.pdf]

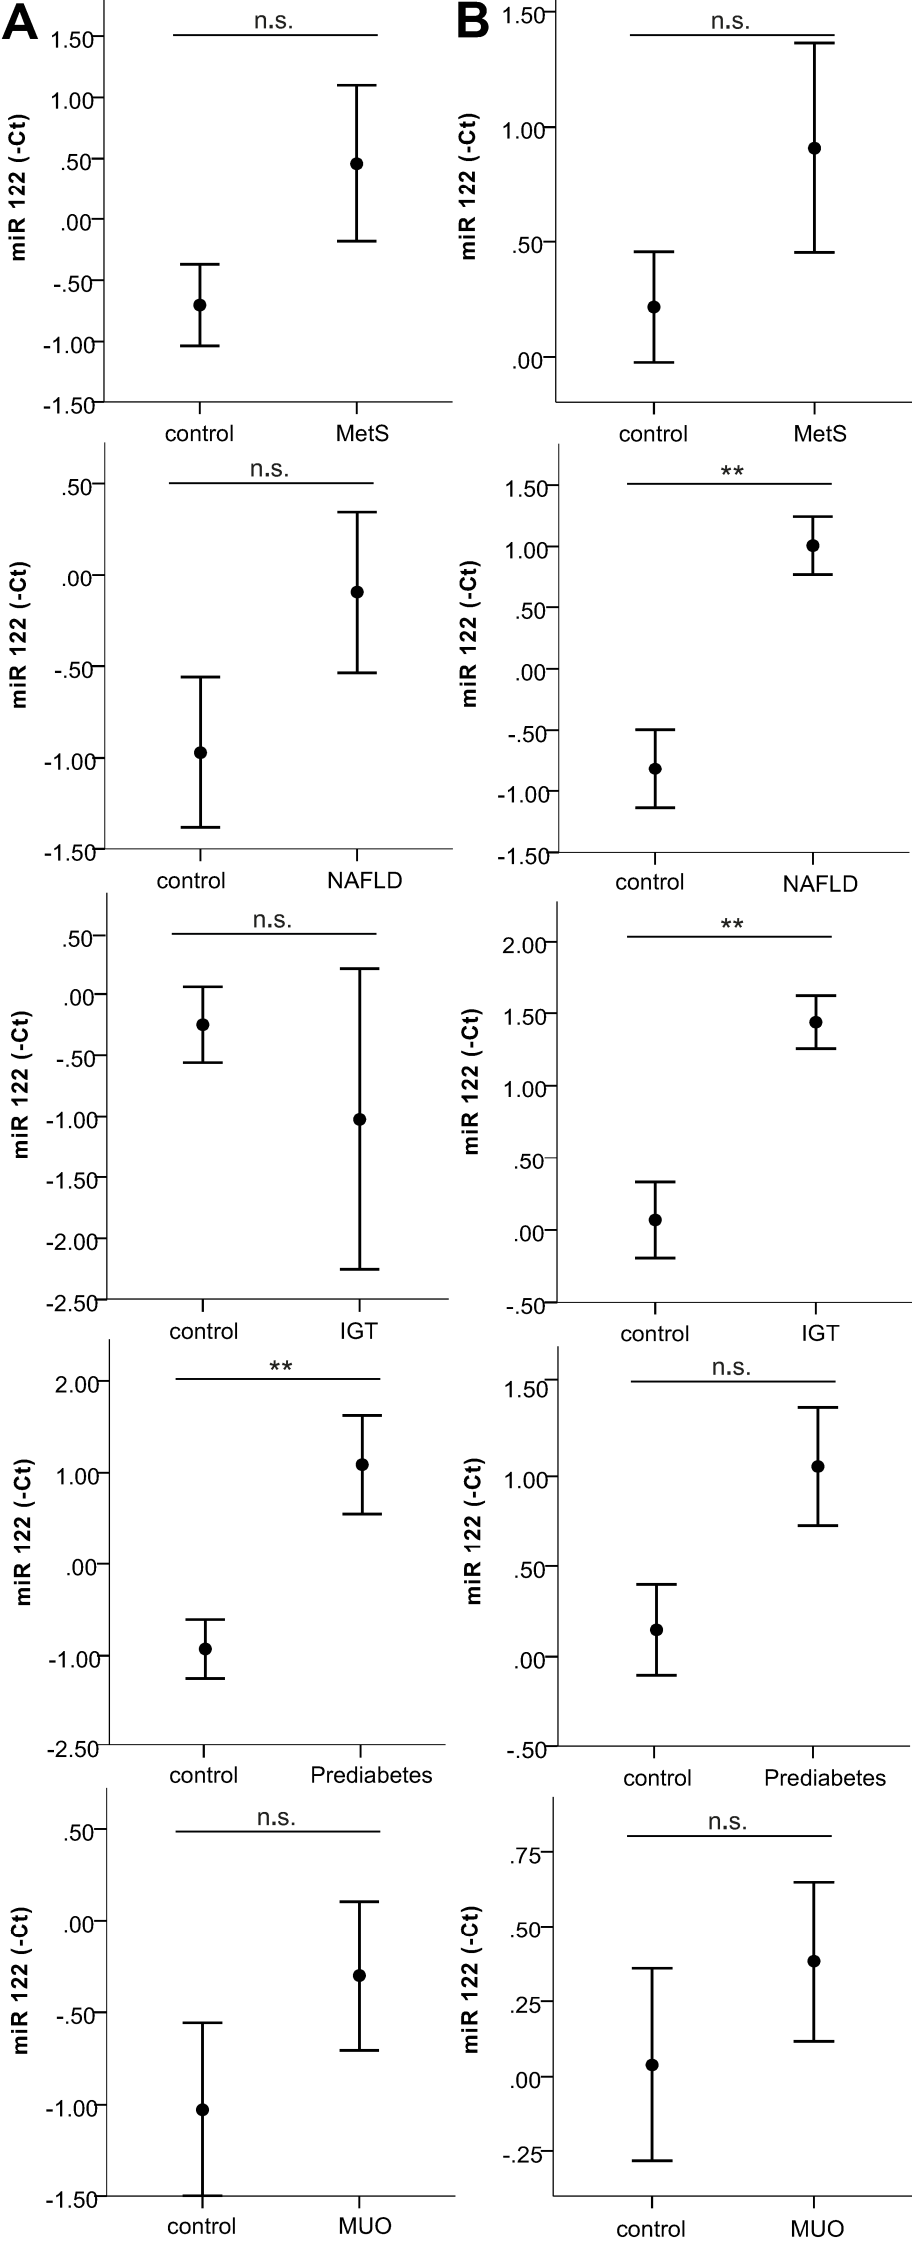

**Supplementary Figure 1.**  
 miRNA 122 levels in girls (A) and boys (B) with/without the respective comorbidity. Mean values of miRNA relative expression ( $-\Delta\text{Ct}$  values) and error bars indicating SEM are shown. \* $p < 0.05$ ; \*\* $p < 0.01$
